# Supplementary material for: Detection of porphyrins in vertebrate fossils from the Messel and implications for organic preservation in the fossil record
Source: PubMed Central journal article supplement (PMC9242450; doi:10.1371/journal.pone.0269568), 2022-06-29
Supplement: pone.0269568.s003.pdf [file pone.0269568.s003.pdf]

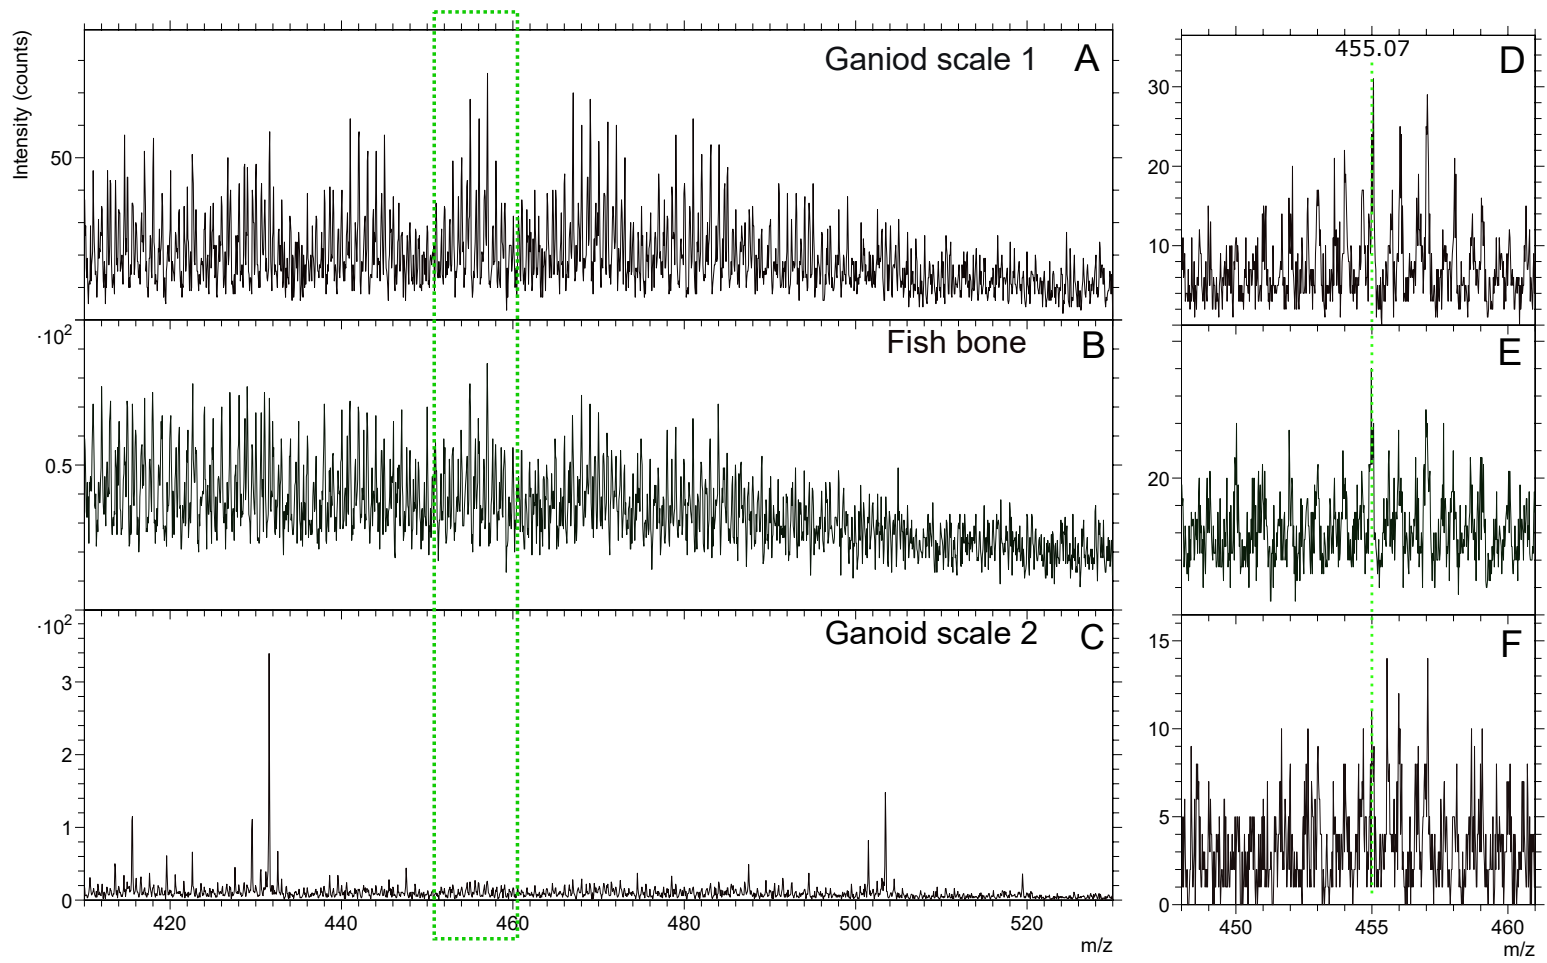

Supplementary Figure 3
